# Supplementary material for: Female physician and pregnancy- effect of the amended German maternity protection act on female doctors’ careers
Source: publisher site journal article supplement (doi:10.1515/iss-2022-0024), 2023-03-01
Supplement: Supplementary file [file j_iss-2022-0024_suppl_001.pdf]

## Reviewer Assessment

# H. Raestrup et al.: Female physician and pregnancy- Effect of the amended German Maternity Protection Act on female doctors' careers

## Reviewers' Comments to Original Submission

### Reviewer 1: Hidas, Christine

Date received: 06-Dec-2022

Reviewer recommendation: **Accept in present form**

Reviewer overall scoring: **Excellent**

#### Comments to author:

Very important topic, shows the reality in the hospital, the problems for the career of medical women on the basis of a purely legal law- this must be changed.

### Reviewer 2: anonymous

Date received: 15-Dec-2022

Reviewer recommendation: **Accept in present form**

Reviewer overall scoring: **High**

#### Comments to author:

Important theme, good to show the effect of the "modernization" of the German Maternity Protection Act. The practical implementation doesn't entail any improvement of female participation....
